# Supplementary material for: Integrative analysis of gut microbiome and host transcriptomes reveals associations between treatment outcomes and immunotherapy‐induced colitis
Source: PubMed Central journal article supplement (PMC8978521; doi:10.1002/1878-0261.13062), 2021-07-28

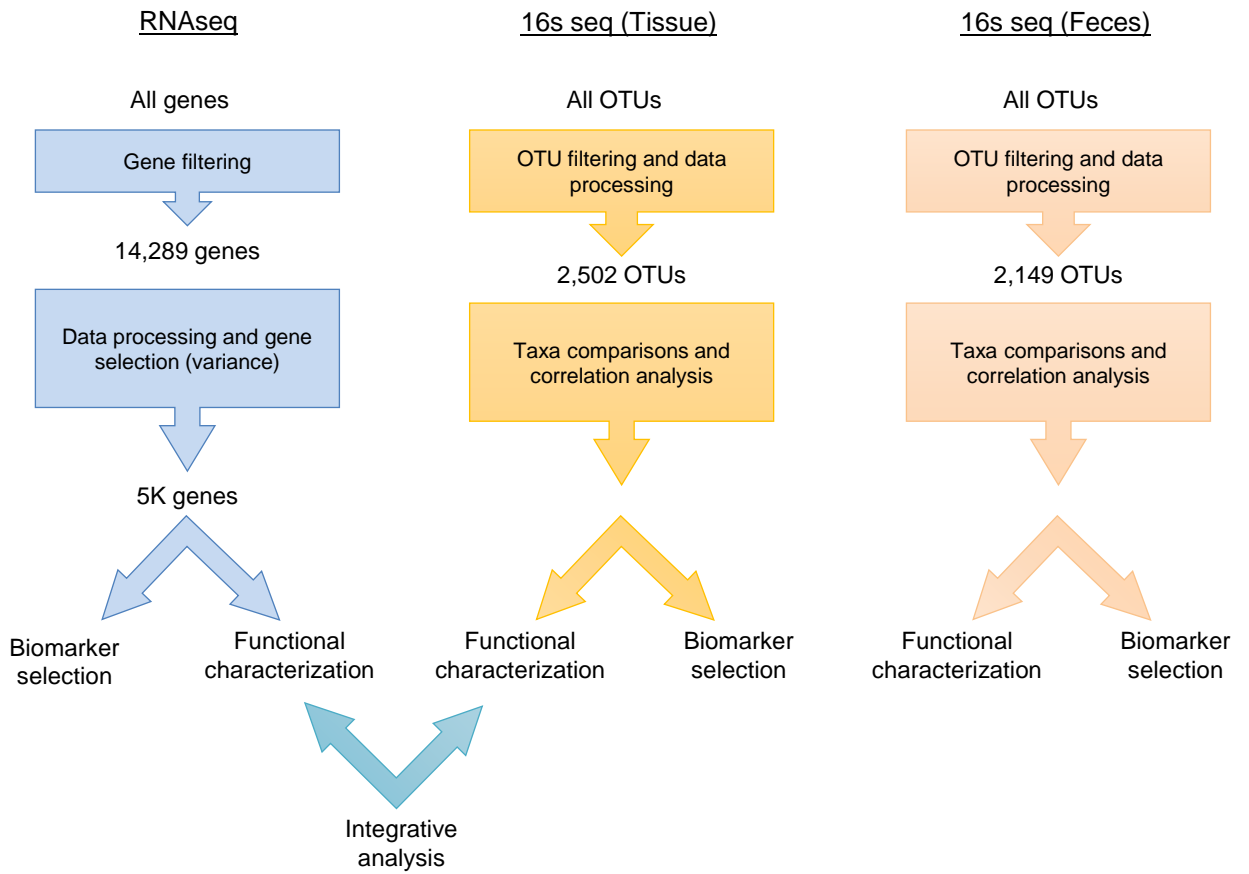

Supplement: MOL2-16-1493-s003.pdf [file MOL2-16-1493-s003.pdf]
